# Supplementary material
Source: PubMed Central journal article supplement (PMC5506487)
Supplement: NIHMS868520-supplement-2.pdf [file NIHMS868520-supplement-2.pdf]

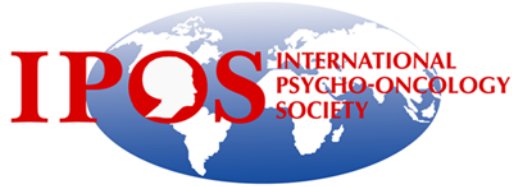

## **2014 Human Rights Task Force Report**

**Date: October 1, 2014**

### 1. A BRIEF STATEMENT OF THE MISSION OF THE HUMAN RIGHTS TASK FORCE

The IPOS Human Rights Task Force was established in 2008 to develop an international strategy of advocacy for the global availability of adequate psychosocial cancer care by promoting the availability of psycho-oncology services and programs as a Human Rights issue.

### 2. 2013 – 2014 GOALS AND STRATEGIES accomplished

- A. In 2013-14, the IPOS Human Right Task Force completed and submitted to the Executive Committee : **A Joint Declaration and Statement of Commitment Calling for the Recognition of Psychosocial Cancer Care as a Human Right .**

Please see this document attached to this report.

**ACTION ITEM REQUESTED OF THE BOARD:** The IPOS Task Force on Human Rights asks that this declaration, which we propose be called “The Lisbon Declaration” be voted on by the full Board and approved, and then put up for endorsement by the full IPOS Membership. If approved, the Task Force additionally requests that the IPOS Board post the Declaration on the IPOS website and solicit endorsement of the declaration by international Oncology, Oncology Nursing, Palliative Care, Oncology Social Work, Advocacy and other related organizations ( the World psychiatric Association), as well as members of IPOS, IPOS Federation members, the professional public and the general public, A Press Conference at some point, to lunch this effort to solicit co-sponsors of this declaration would be sought at some point between the Lisbon World Congress and next year’s World Congress.

- B. The IPOS Human Rights Task Force was made aware of a situation in Kenya where children with cancer were being detained in hospital. Reports from Moi Teaching and Referral Hospital, Western Kenya state that children with cancer are detained in hospital after completion of their treatment if parents can’t pay bill in full. Bodies of children who die in the hospital are not released to their families if parents have not paid bill in full. Guards, social workers, nurses are enlisted to keep child patients in hospital;

Dr Andrea Patenaude has brought this issue to the attention of the IPOS Human Rights Task Force. A statement of support has been drafted by SIOF and there is a request for from SIOF to support the Statement (attached to this report )

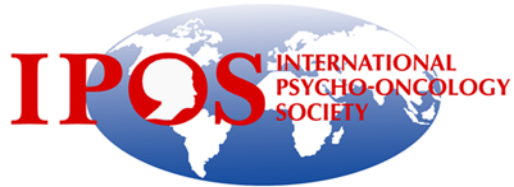

**ACTION ITEM FOR THE BOARD:** The IPOS Human Rights Task Force asks that the Board vote endorsing that: The International Psycho-Oncology Society (IPOS) wishes to express its solidarity with and support for the efforts of the International Pediatric Oncology Society (SIOP) Abandonment of Treatment Committee to help bring an end to the unethical practices of hospital detention of children with cancer in Kenyan public hospitals.

### 3. 2014 – 2015 GOALS AND STRATEGIES planned

We have three goals:

- 1) To pursue endorsement of the Lisbon declaration by the IPOS Federation and various International cancer related organizations. A press conference and website campaign may be helpful
- 2) To pursue our efforts related to cooperation with SIOP around Human Rights Violations related to cancer care of children in Kenya and Africa.
- 3) To organize a Human Rights Symposium at the 2015 World Congress of Psycho-oncology.

### 4. ACTIVITIES OF THE IPOS Human Rights task Force IN THE PAST YEAR

See #2

### 5. ISSUES ARISING IN THE PAST YEAR

See #2

Dr Andrea Patenaude added as a member of the Human Rights task Force.

### 6. COORDINATION WITH RELATED COMMITTEES (IF APPLICABLE)

We plan to coordinate with the Website Committee

### 7. FUNDRAISING STRATEGIES

None anticipated

### 8. ANY OTHER BUSINESS None

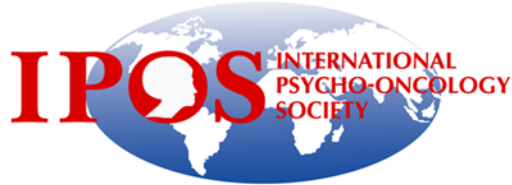

9. PLEASE ATTACH THE FOLLOWING DOCUMENTS WHEN SUBMITTING YOUR REPORT, IF AVAILABLE:

MEETING MINUTES FROM THE PAST YEAR :

The IPOS Human Rights Task Force last met in Brisbane where the Joint declaration was written and then modified over the following months, and submitted to the Board for action in Rotterdam. No action was undertaken by the Board in Rotterdam, so the Declaration was updated and resubmitted to the Executive Committee

TERMS OF REFERENCE AS THEY STAND We have no terms of reference developed

2013 – 2104 MEMBER ROSTER INCLUDING CONTACT INFORMATION (PLEASE INDICATE THE CURRENT CHAIR AND DEPUTY CHAIR)

**William Breitbart – USA (Chair)**

**Luigi Grassi- Italy**

**Luiza Travado- Portugal**

**Lea Baider- Israel**

**David Morrison- Canada (Emeritus)**

- 2014 – 2015 MEMBER ROSTER INCLUDING CONTACT INFORMATION (PLEASE INDICATE Proposed CHAIR AND DEPUTY CHAIR)

**William Breitbart – USA (Chair)**

Chairman Department of psychiatry and Behavioral Sciences, Memorial Sloan Kettering Cancer Center email [breitbaw@mskcc.org](mailto:breitbaw@mskcc.org)

**Luigi Grassi- Italy-**

Chair, Department of Psychiatry, University of Ferrara, Italy.

Email [luigi.grassi@unife.it](mailto:luigi.grassi@unife.it)

**Luiza Travado- Portugal**

President IPOS, email: [luzia.travado@chlisboa-zc.min-saude.pt](mailto:luzia.travado@chlisboa-zc.min-saude.pt)

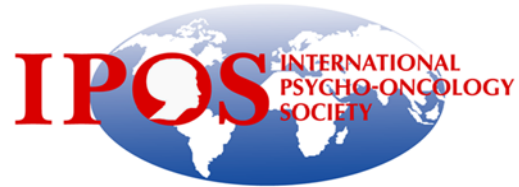

**Lea Baider- Israel**

Former President of IPOS and Director, Psycho-Oncology Unit, Hadassah University Hospital, Jerusalem, Israel, email [baider@cc.huji.ac.il](mailto:baider@cc.huji.ac.il)

**Patenaude, Andrea Farkas, Ph.D. USA ( proposed Deputy Chair)**

Dana farber Cancer Institute

Email [[Andrea\\_Patenaude@dfci.harvard.edu](mailto:Andrea_Patenaude@dfci.harvard.edu)]
